# Supplementary material
Source: PubMed Central journal article supplement (PMC8052300)
Supplement: NIHMS1675825-supplement-3.pdf [file NIHMS1675825-supplement-3.pdf]

**Figure S1. Genome browser snapshots of STARR-seq enhancers with mutated TF binding motifs, Related to Figure 1**

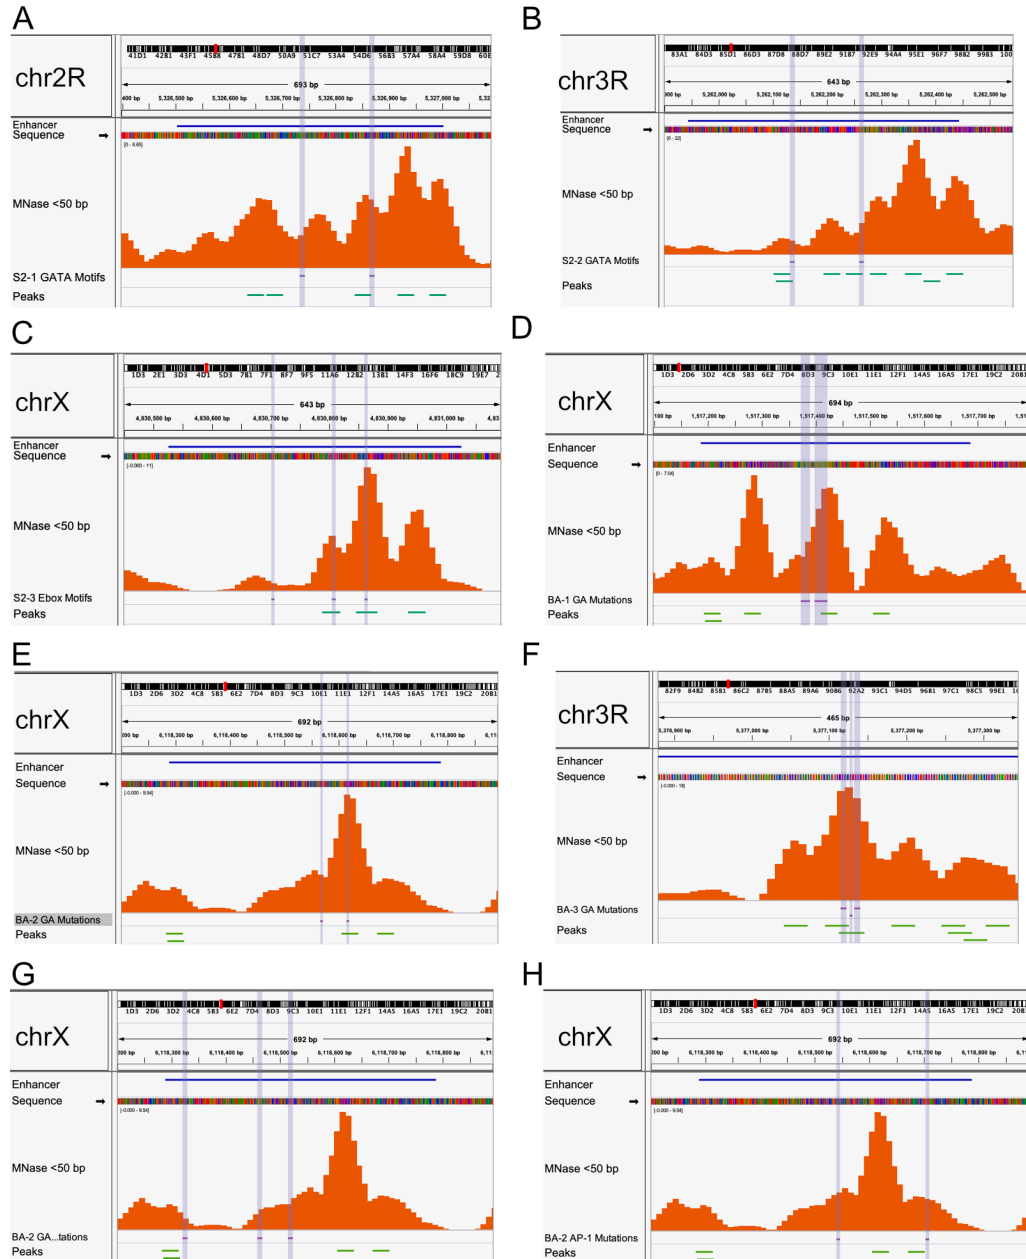

**Figure S1. Genome browser snapshots of STARR-seq enhancers with mutated TF binding motifs.** The top track shows a STARR-seq enhancer. Second track shows enrichment of MNase short fragments. The third track shows motifs that were mutated in the reporters in Yanez-Cuna et al., 2014. Fourth track represents peaks that were identified. The blue transparent boxes mark position of mutated motifs across all tracks. 6 out of 8 reporters show at least one mutated motif overlapping a short MNase peak, with many reporters showing multiple mutated motifs overlapping MNase peaks. A) S2-1 reporter where GATA motifs were mutated. The second motif occurrence overlaps MNase peak. B) S2-2 reporter where GATA motifs were mutated. Both motifs overlap MNase peaks. C) S2-3 reporter where E-box motifs were mutated. Second and

third motifs overlap MNase peaks. D) BA-1 reporter where GA-repeat motifs were mutated. Second GA motif overlaps Mnase peak. E) BA-2 reporter where GA-repeat motifs were mutated. Second GA motif overlaps Mnase peak. F) BA-3 reporter where GA-repeat motifs were mutated. All three motifs overlap MNase peaks. G) BA-2 reporter where GATA motifs were mutated. Here, the motifs do not overlap MNase peaks. H) BA-2 reporter where AP-1 motifs were mutated. Here, the motifs do not overlap MNase peaks.

**Figure S2. Trl binding at active enhancers, Related to Figure 2**

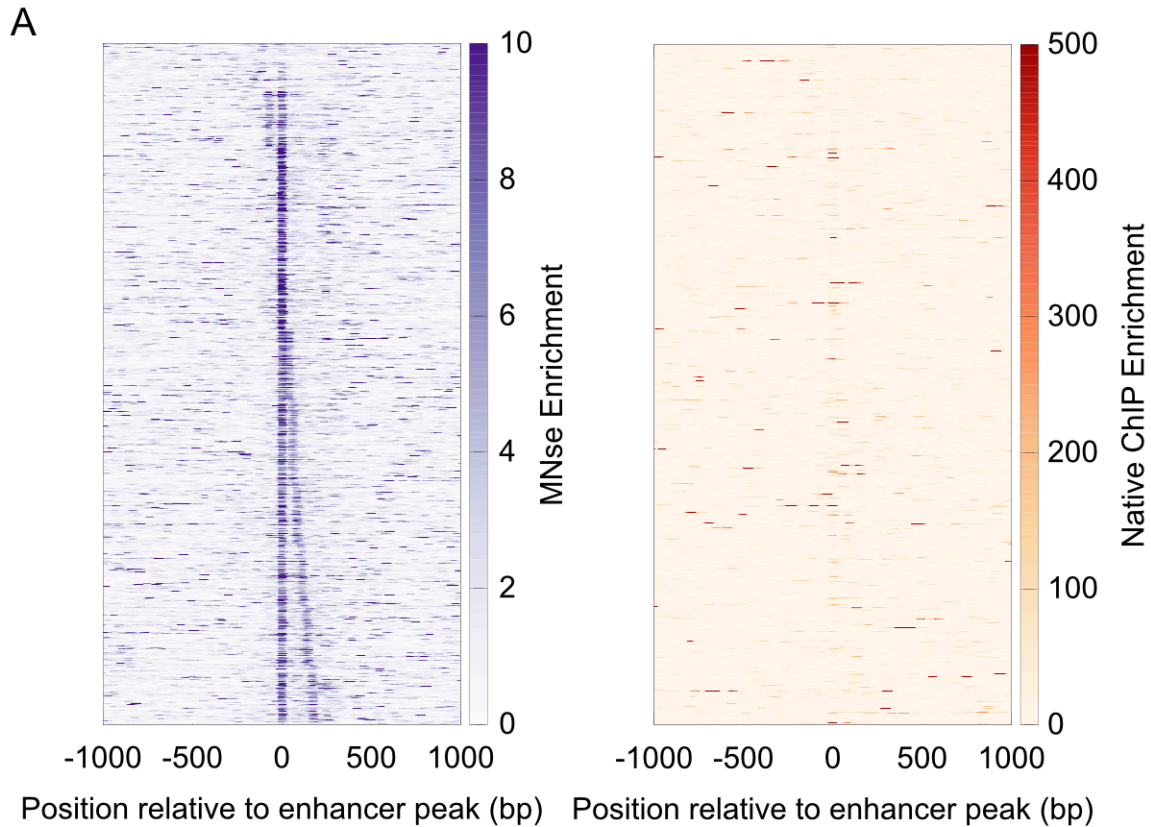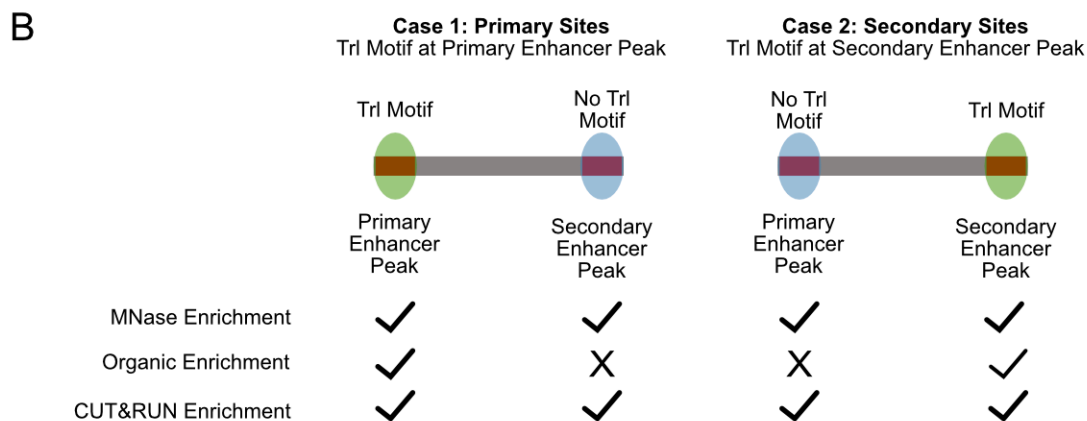

**Figure S2. Trl binding at active enhancers.** **A)** Heatmaps comparing enrichment of MNase short fragments and Trl ORGANIC plotted relative to the primary peak of MNase short protection at enhancers with no Trl motifs. **B)** Schematic showing the definition of primary and secondary sites based on the presence of Trl motifs and the expected outcomes from MNase, ORGANIC, and CUT&RUN in the context of Trl binding at primary or secondary sites. Two cases are defined based on Trl binding. Case 1: where Trl (shown as green eclipse) is binding at the primary peak of the enhancer (the left extreme of the DNA) and non-Trl TF binds at the secondary peak; and Case 2: the opposite of case 1. MNase and CUT&RUN are expected to release both bound Trl and other TFs, but ORGANIC will only recover bound Trl.

**Figure S3. Sequence logo representation of motif families enriched in different enhancer clusters, Related to Figure 3**

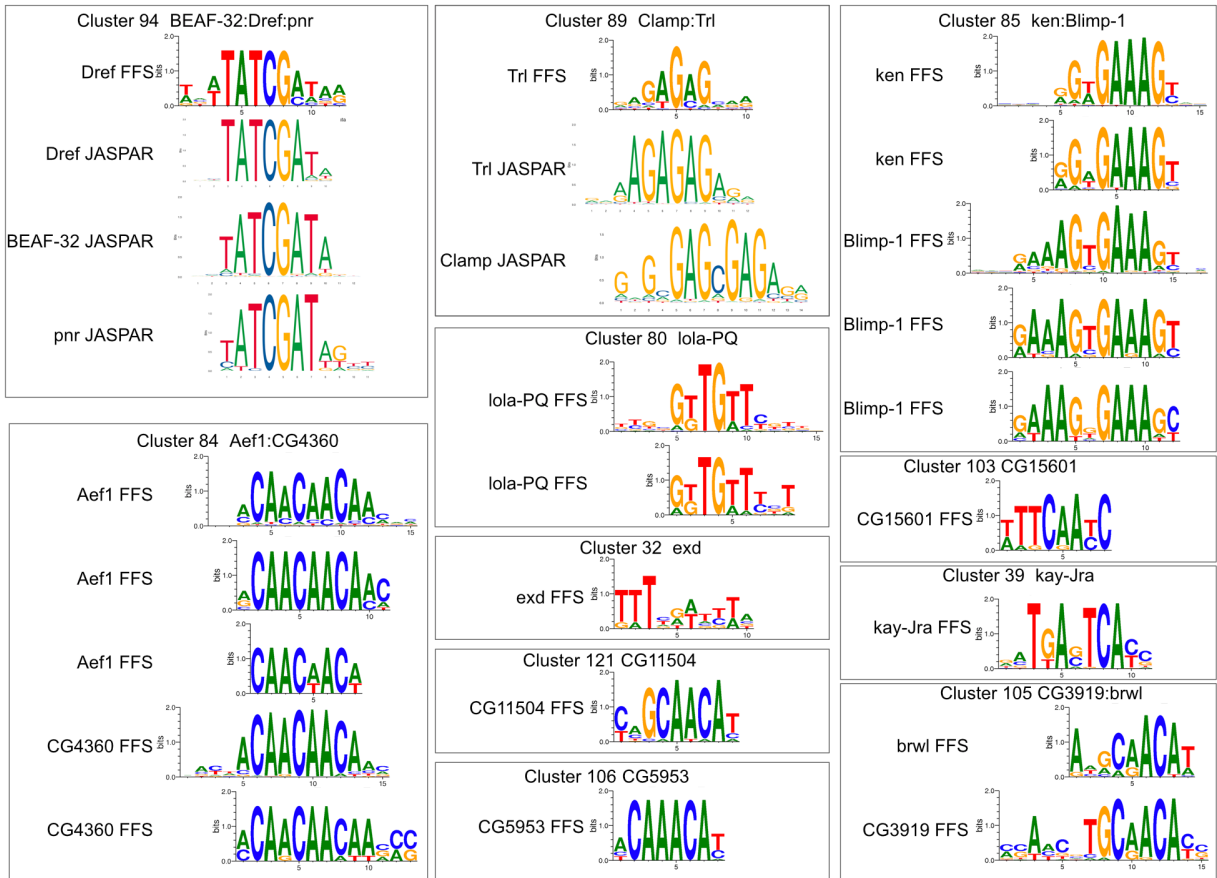

**Figure S3. Sequence logo representation of motif families enriched in different enhancer clusters in Figure 3C.**

**Figure S4. V-plots at enhancer clusters, Related to Figure 4**

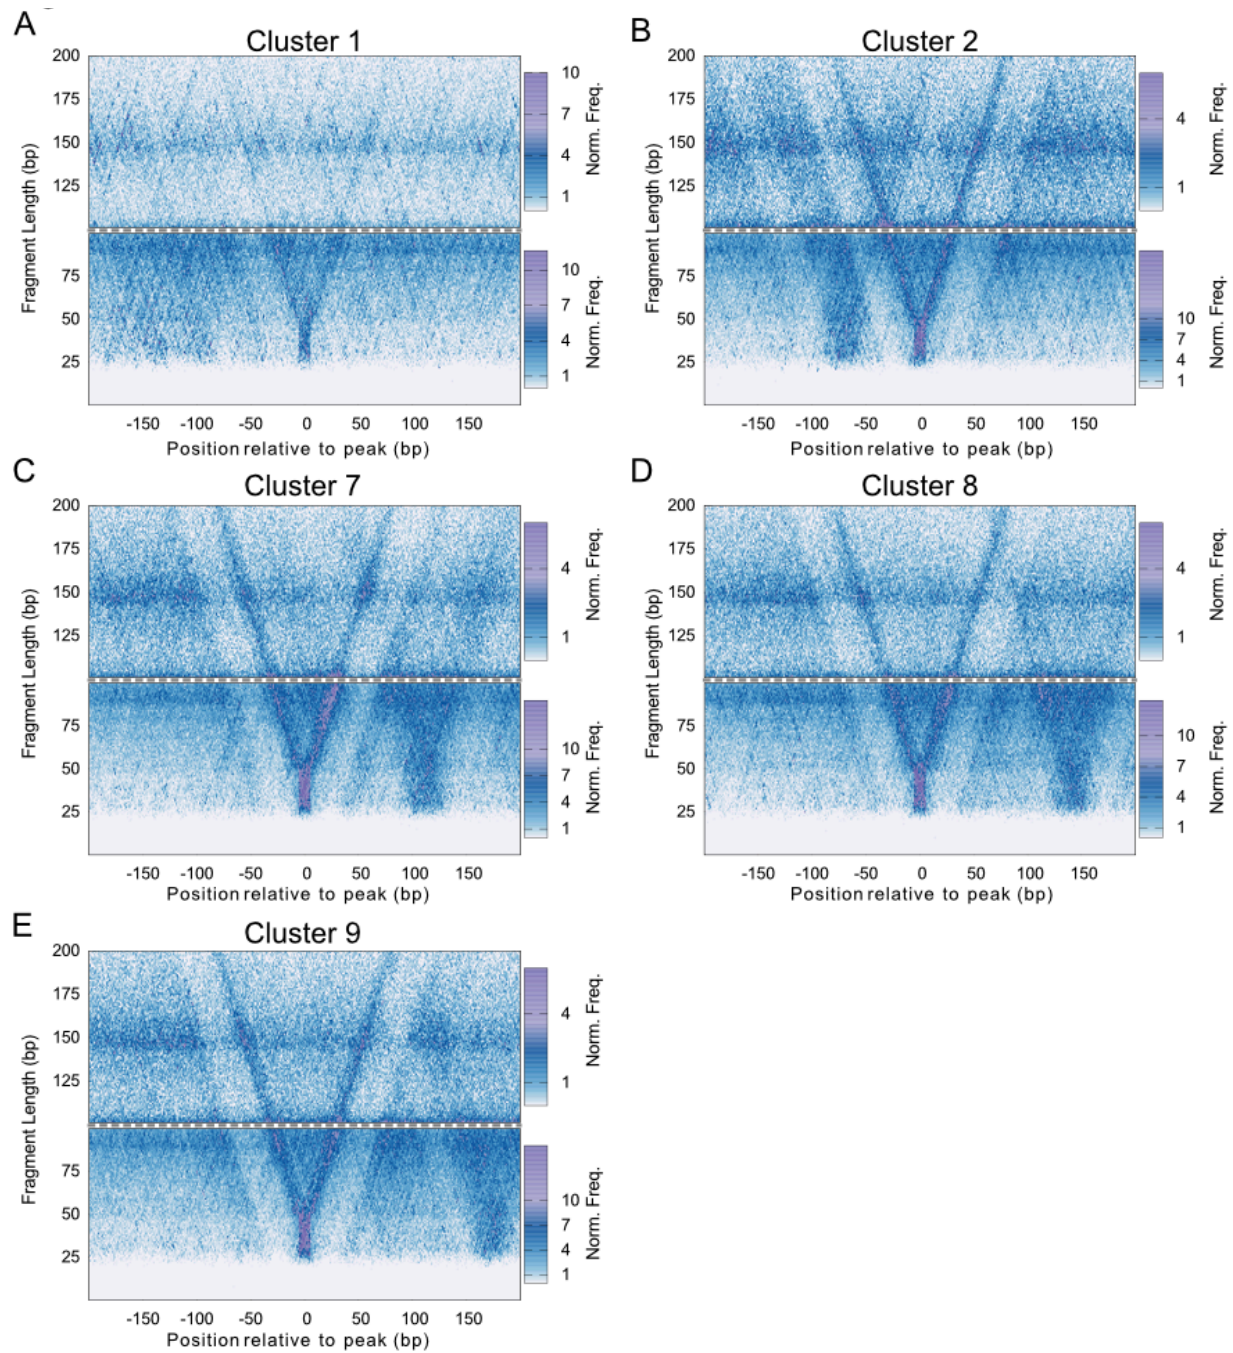

**Figure S4. V-plots at enhancer clusters.** Fragment midpoint versus fragment length plot (V-plot) centered at the primary peak for enhancers for Clusters 1 (A), 2 (B), 7 (C), 8 (D), and 9 (E). Fragments 100-200 bp (top) and 0-100 bp (bottom) are plotted separately because <100 bp fragments are over-represented due to experimental size selection for enriching TF protections.

**Figure S5. Distribution of co-bound species relative to primary enhancer peak, Related to Figure 4**

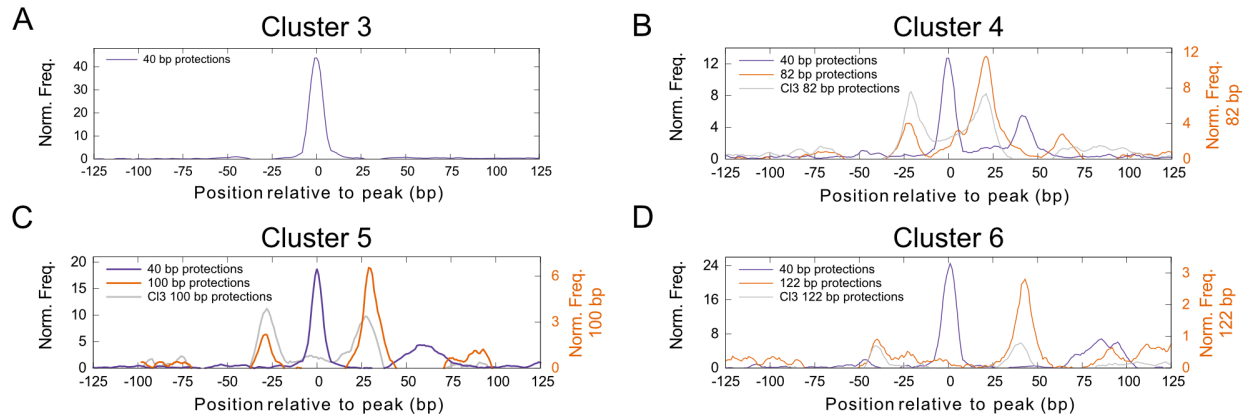

**Figure S5. Distribution of co-bound species relative to primary enhancer peak. A)** The average density of centers of  $40 \pm 5$  bp fragments calculated from the V-plot is plotted relative to the primary enhancer peak for Cluster 3. **B)** The average density of  $40 \pm 5$  bp and  $82 \pm 5$  bp fragments calculated from the V-plot of Cluster 4. The gray line represents the density of  $82 \pm 5$  bp fragments calculated from Cluster 3. **C)** The average density of  $40 \pm 5$  bp and  $100 \pm 5$  bp fragments calculated from the V-plot of Cluster 5. The gray line represents the density of  $100 \pm 5$  bp fragments calculated from Cluster 3. **D)** The average density of  $40 \pm 5$  bp and  $122 \pm 5$  bp fragments calculated from the V-plot of Cluster 6. The gray line represents the density of  $122 \pm 5$  bp fragments calculated from Cluster 3.

**Figure S6. Demonstration of criteria and constraints applied in dSMF co-binding analysis, Related to Figure 6**

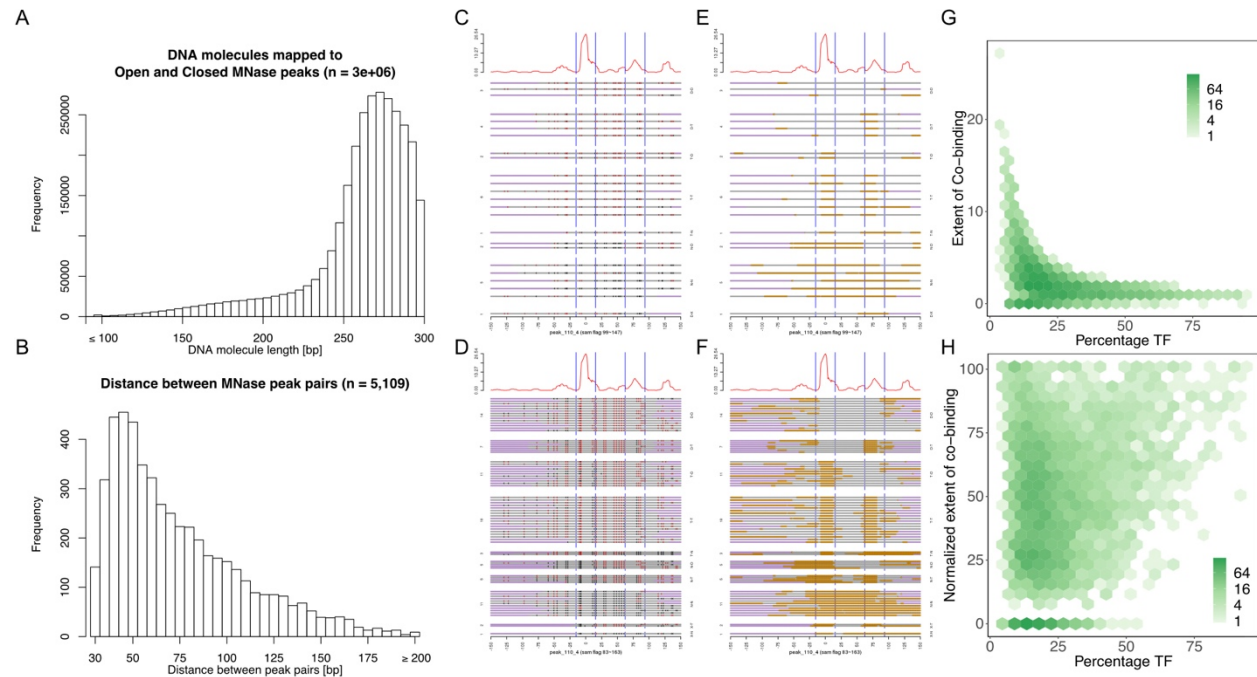

**Figure S6. Demonstration of criteria and constraints applied in dSMF co-binding analysis.**

**A)** Distribution of DNA molecules mapped to all MNase peaks from active and closed enhancers. A DNA molecule indicates overlapping/adjacent read mate pairs from bisulfite sequencing reads.

**B)** Distribution of distance between MNase peak pairs. Total MNase peak pairs (n = 5,109) with at least 5 TF-bound DNA molecules for both TFBSs

**(C-F)** DNA molecule selection criteria for co-binding analysis: **C)** Methylation vector plot for DNA molecules example peak shown in Figure 5C. These molecules are prepared using paired-end reads with sam flag 99 and 147. Red dot: methylated cytosine; Black dot: unmethylated cytosine; Purple dot: Fill-in; D: Naked DNA state; N: Nucleosome state; T: TF-bound state; X: molecule to be discarded. **D)** Footprint called using methylation patterns (5mC-(C)n-5mC); orange dot: footprint. Here only one read (labeled D-X in right) is discarded as it can be seen that the footprint called for the right MNase peak corresponds to the right edge of the DNA molecule, thus not considered in the analysis. **E)** Same representation for DNA molecules prepared from paired-end reads with sam flag 163 and 83. **F)** Bottom right: Footprint representation. Three DNA molecules are discarded from analysis (two with X-T and one with X-N).

**G)** Extent of co-binding before normalization: Low percentage TF (total TF bound molecules)/(Total molecules) lead to an unreliably high extent of co-binding. **H)** Extent of co-binding after normalization (see Methods).

**Figure S7. Comparison of V-plots and dSMF scores at enhancer peak pairs, Related to Figure 7**

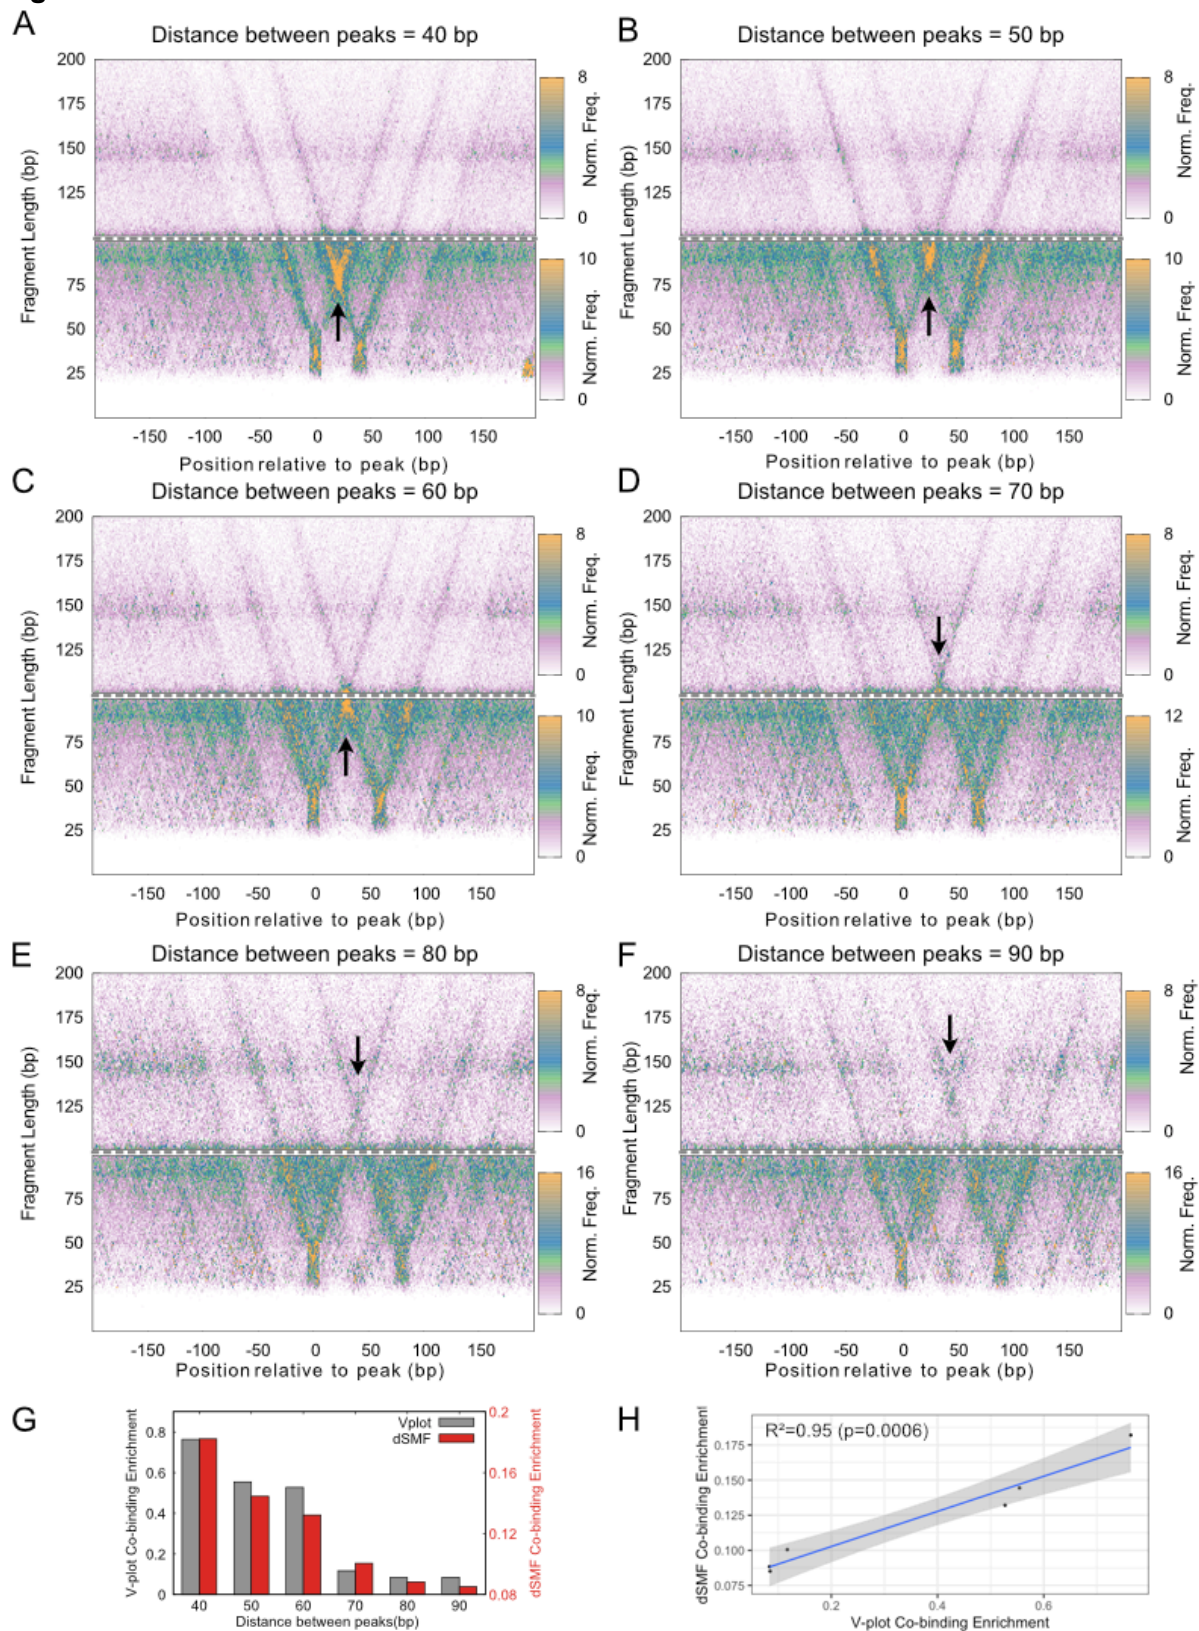



**Figure S7. Comparison of V-plots and dSMF scores at enhancer peak pairs.** V-plots from pairs of TF binding sites that were analyzed by dSMF at a separation of  $40\pm 2$  bp (**A**),  $50\pm 2$  bp (**B**),  $60\pm 2$  bp (**C**),  $70\pm 2$  bp (**D**),  $80\pm 2$  bp (**E**), and  $90\pm 2$  bp (**F**). The arrows point to the vertex that represents co-bound species. **G**) The ratio of co-bound states to individual states was calculated for both the V-plots and for the dSMF analysis (combining all sites at a given distance). We see enrichment of co-binding decrease as a function of distance for both V-plots and dSMF. **H**) We determined the correlation between the co-binding enrichments calculated using both the methods.

**Table S4. External datasets used in this study, Related to STAR Methods**

| S. No. | Dataset                                         | Figures                  | GEO Accession ID | Reference                         |
|--------|-------------------------------------------------|--------------------------|------------------|-----------------------------------|
| 1      | Short and Long Fragments Sequenced after MNase  | Figure 1, 2, 3, 4, and 7 | GSM1974516       | (Ramachandran and Henikoff, 2016) |
| 2      | Short and Long Fragments Sequenced after MNase  | Figure 1, 2, 3, 4, and 7 | GSM1974518       | (Ramachandran and Henikoff, 2016) |
| 3      | Short and Long Fragments Sequenced after MNase  | Figure 1, 2, 3, 4, and 7 | GSM1974522       | (Ramachandran and Henikoff, 2016) |
| 4      | Short and Long Fragments Sequenced after MNase  | Figure 1, 2, 3, 4, and 7 | GSM1974524       | (Ramachandran and Henikoff, 2016) |
| 5      | Short and Long Fragments Sequenced after MNase  | Figure 1, 2, 3, 4, and 7 | GSM1974526       | (Ramachandran and Henikoff, 2016) |
| 6      | Short and Long Fragments Sequenced after MNase  | Figure 1, 2, 3, 4, and 7 | GSM2592578       | (Ramachandran et al., 2017)       |
| 7      | Short and Long Fragments Sequenced after MNase  | Figure 1, 2, 3, 4, and 7 | GSM2592579       | (Ramachandran et al., 2017)       |
| 8      | Short and Long Fragments Sequenced after MNase  | Figure 1, 2, 3, 4, and 7 | GSM763030        | (Teves and Henikoff, 2011)        |
| 9      | H3K27me3 CUT&RUN                                | Figure 1                 | GSM3424765       | (Ahmad and Spens, 2019)           |
| 10     | H3K27ac CUT&RUN                                 | Figure 1                 |                  | This study                        |
| 11     | DNase-seq                                       | Figure 1                 | MODENCODE 3324   | <a href="#">Source</a>            |
| 12     | Trl Native ChIP-seq                             | Figure 2, 7              | GSM1111722       | (Kasinathan et al., 2014)         |
|        | Trl Native ChIP-seq                             | Figure 2, 7              | GSM1111723       | (Kasinathan et al., 2014)         |
| 13     | H3 ChIP-seq                                     | Figure 6                 | GSM2521698       | (Mueller et al., 2017)            |
| 14     | H3 ChIP-seq                                     | Figure 6                 | GSM2521699       | (Mueller et al., 2017)            |
| 15     | H3 ChIP-seq                                     | Figure 6                 | GSM2521702       | (Mueller et al., 2017)            |
| 16     | H3 ChIP-seq                                     | Figure 6                 | GSM2521703       | (Mueller et al., 2017)            |
| 17     | CATCH-IT                                        | Figure 6                 | GSM763034        | (Teves and Henikoff, 2011)        |
| 18     | Trl CUT&RUN                                     | Figure 7                 |                  | This study                        |
| 19     | Bisulfite sequencing data used in dSMF analysis | Figure 4, 5 and 6        | GSM2050819       | (Krebs et al., 2017)              |
| 20     | Bisulfite sequencing data used in dSMF analysis | Figure 4, 5 and 6        | GSM2050820       | (Krebs et al., 2017)              |
| 21     | Bisulfite sequencing data used in dSMF analysis | Figure 4, 5 and 6        | GSM2050821       | (Krebs et al., 2017)              |
| 22     | Bisulfite sequencing data used in dSMF analysis | Figure 4, 5 and 6        | GSM2050822       | (Krebs et al., 2017)              |
